# Supplementary material
Source: Springer Nature journal article supplement (https://www.springermedizin.de/resource/supplementary/12865_2009_287_MOESM1_ESM.pdf/9427742)

**PBMC-Day 0**

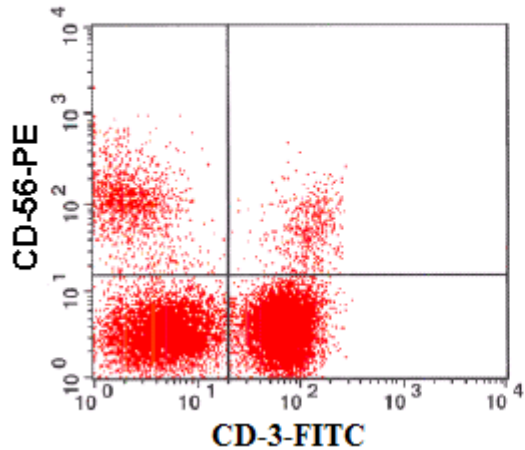

**D2NK-Day 14**

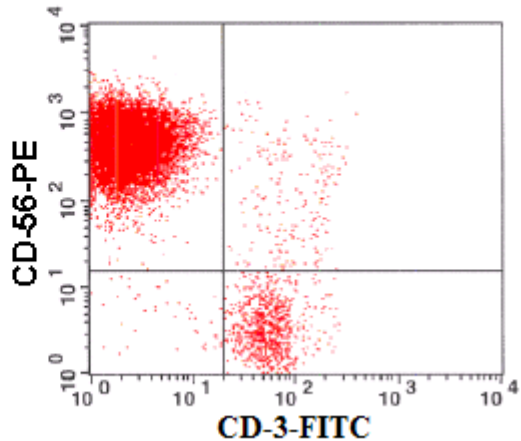

Supplement: MOESM1 [file 9427742]
